# Supplementary material for: Plastic response of Medicago sativa L. root system traits and cold resistance to simulated rainfall events
Source: PeerJ. 2021 Sep 9;9:e11962. doi: 10.7717/peerj.11962 (PMC8435203; doi:10.7717/peerj.11962)
Supplement: Supplemental Information 1 [file peerj-09-11962-s001.xlsx]

## Sheet: Sheet1
																		Phase1					Phase2
			LT50（phase1）	LT50（phase2）	AGB	BGB	R/S	PRL	LRL	CRD	RSA	RV	SRL	ALL	RF	TI	FD	MDA	Pro	SS	Strach		MDA	Pro	SS	Strach
C1D2	C1	D2	3.52	-6.48	1.75	0.7336	0.4192	44.7	123	3.26	62.9736	0.71	228.599	0.1199	1398.67	0.5928	1.503	73.0317	372	61.6319	71.7136		103.183	778	85.7	53.4555
	C1	D2	4.79	-5.24	1.65	0.6087	0.368909	40.9	114	2.65	46.6368	0.62	254.444	0.1016	1524.41	0.6318	1.4389	76.4253	378	60.9613	72.5131		110.652	803	74.6	50.0292
	C1	D2	4.57	-5.56	1.74	0.5032	0.289195	39.5	94.5	3.11	72.9835	0.74	266.365	0.1022	1311.5	0.6128	1.4564	77.1041	333	62.4031	72.7312		97.5461	795	78.9	48.1857
	C1	D2	4.85	-4.27	1.48	0.6544	0.442162	40.2	101	4.25	56.3661	0.798	215.717	0.12	1176.38	0.5907	1.3979	74.556	345	58.6493	70.0864		103.19	884	76.16	54.288
	C1	D2	3.57	-5.92	1.61	0.8703	0.540559	45.7	107.5	4.35	80.1811	0.79	176.026	0.1046	1464.58	0.5746	1.4464	76.2158	367	63.0428	73.2147		116.376	783	77.543	51.5326
	C1	D2	4.66	-7.12	1.57	0.9356	0.595924	41.8	109	2.18	73.1059	0.839	161.164	0.1027	1468.21	0.6137	1.4434	75.027	359	59.8744	72.6953		118.811	845	78.1033	53.1599
C1D4	C1	D4	2.6	-7.15	2.1	1.3374	0.636857	43.5	110.5	5.09	66.7122	0.81228	115.165	0.1072	1436.77	0.6424	1.4405	79.0045	1112	113.037	95.6278		100.049	1443	119.517	74.6143
	C1	D4	2.93	-5.52	1.74	0.8253	0.47431	46.6	88.5	5.18	77.6338	0.881931	163.652	0.1017	1328.04	0.6226	1.5111	76.6968	1076	111.192	96.2836		101.01	1219	114.17	67.0849
	C1	D4	3.47	-7.2	1.73	0.6332	0.366012	44.2	91.5	4.47	62.9764	0.769527	214.322	0.1235	1098.86	0.6513	1.3869	81.1765	1080	110.723	94.7686		99.9095	1269	122.828	68.9978
	C1	D4	3.54	-5.77	2.01	1.1766	0.585373	39.8	89.5	4.19	68.4176	0.915	109.907	0.0969	1334.53	0.6109	1.4347	78.0532	1096	112.527	96.3128		107.796	1315	121.145	71.1058
	C1	D4	3.27	-5.69	2.03	0.4668	0.229951	43.5	102	3.48	52.4975	0.901607	311.626	0.1374	1058.71	0.6077	1.4887	80.6781	1103	111.872	95.0842		110.253	1233	123.667	66.2243
	C1	D4	4.07	-6.28	1.6	1.1034	0.689625	41	94.5	4.34	69.0506	0.82	122.817	0.0925	1465.04	0.6126	1.5518	78.9752	1087	113.053	97.0541		105.01	1403	125.528	68.6377
C1D8	C1	D8	1.13	-7	1.45	0.7259	0.500621	45.9	66	4.2	46.003	0.83	154.242	0.14	799.743	0.6217	1.4113	66.5158	2910	113.573	79.274		87.6013	3429	128.67	57.8802
	C1	D8	2.07	-7.84	1.63	1.1445	0.702147	39	67.5	4	37.6174	0.83	93.0808	0.1385	769.177	0.6724	1.4293	66.7873	2879	113.808	78.9513		87.9589	3541	117.841	58.6487
	C1	D8	1.52	-9	1.51	1.4304	0.947285	42.9	77.5	3.35	28.3418	0.77	84.1827	0.1754	686.517	0.6306	1.3507	71.6742	2855	112.969	78.0523		94.3949	3624	125.23	52.0037
	C1	D8	0.42	-8.62	1.6	1.6269	1.01681	46.5	63.5	3.69	56.3941	0.75	67.6305	0.1139	966.005	0.6329	1.4485	71.267	2912	115.115	78.0753		93.8586	3449	130.793	59.0202
	C1	D8	1.35	-8.57	1.47	1.0448	0.710748	40.7	79	3.71	49.6773	0.86	114.563	0.1211	988.398	0.6416	1.403	67.384	2884	113.656	77.1438		88.7447	3640	126.73	51.3518
	C1	D8	1.62	-9.01	1.53	1.2341	0.806601	38.2	83	4.42	33.3287	0.81	98.2441	0.1498	809.366	0.6255	1.3283	68.631	2923	112.092	79.0126		90.387	3570	119.592	60.6927
C2D2	C2	D2	3.41	-4.86	1.82	1.184	0.650549	42.6	116.5	5.15	73.7057	0.7868	134.358	0.0721	2206.38	0.6127	1.5659	69.095	220	69.2437	82.3258		118.998	864	86.3176	56.07
	C2	D2	3.84	-4.52	1.76	0.8965	0.509375	41.1	128.5	3.1	61.0999	0.72	189.14	0.1033	1641.47	0.5807	1.4955	67.0588	185	70.1826	81.2761		123.316	793	81.0406	63.3168
	C2	D2	3.98	-3.96	1.88	1.0634	0.565638	39.8	114	4.66	70.6779	0.69594	144.613	0.0989	1554.91	0.5986	1.4817	72.6244	227	68.07	81.476		109.646	902	84.4139	57.4602
	C2	D2	4.51	-5.03	1.87	1.1333	0.606043	47.8	140.5	3.28	80.9309	0.73304	166.133	0.1059	1777.89	0.5638	1.5014	70.0173	197	69.5418	80.0123		122.213	791	90.5472	60.41
	C2	D2	4.32	-2.38	1.25	0.9353	0.74824	41.6	121	4.11	72.8877	0.82098	173.861	0.0933	1742.89	0.6024	1.5138	68.8721	208	70.6675	83.0874		117.705	820	84.414	60.6164
	C2	D2	4.05	-4.49	1.84	0.7992	0.434348	43.5	125.5	3.96	67.6001	0.78625	211.523	0.0882	1916.66	0.5806	1.5141	69.0563	229	67.2806	82.1279		114.947	847	77.8061	57.928
C2D4	C2	D4	2.73	-4.74	1.87	0.6834	0.365455	42.8	105.5	3.59	59.7377	0.81673	217.069	0.0631	2350.95	0.6074	1.4678	71.6742	729	74.4747	64.5627		104.395	887	94.3665	44.3247
	C2	D4	2.8	-3.39	2.44	1.4833	0.60791	45.7	98.5	5.04	67.2189	0.798897	97.2527	0.0973	1482.58	0.6328	1.5283	77.1041	677	75.5812	65.4759		111.546	848	77.1743	51.9799
	C2	D4	2.34	-4.77	1.39	0.5304	0.381583	41	113.5	3.76	54.9875	0.8375	291.256	0.1291	1196.61	0.6089	1.38	75.7466	727	74.877	64.7454		103.758	892	83.6602	47.4558
	C2	D4	3.2	-5.11	1.88	0.7228	0.384468	47.8	112.5	3.45	51.7455	0.84858	221.718	0.1276	1255.94	0.5981	1.4335	73.5064	704	76.636	66.3125		105.808	884	88.9443	40.5802
	C2	D4	3.73	-4.9	1.56	0.9828	0.63	41.2	119	4.04	59.068	0.895565	162.985	0.1228	1304.41	0.6472	1.4986	74.3821	716	74.827	63.8073		107.961	958	96.6237	49.7827
	C2	D4	3.39	-4.61	1.82	1.2567	0.690495	38.5	116.5	4.6	49.8261	0.765011	123.333	0.1178	1315.73	0.6209	1.3791	75.0126	717	75.0928	65.4121		104.792	867	93.8177	45.9341
C2D8	C2	D8	2	-5.23	1.73	0.9709	0.561214	45	94	5.43	50.4333	0.81031	143.208	0.1603	867.38	0.6232	1.4417	88.7783	2643	135.738	97.224		96.921	3277	137.803	66.7596
	C2	D8	0.53	-5.41	1.76	1.1177	0.635057	46.7	72.5	3.76	49.4935	0.8331	106.62	0.1576	756.148	0.6052	1.3593	88.5068	2632	136.609	96.8813		100.563	3581	146.438	74.5137
	C2	D8	1.82	-7.14	1.74	0.7732	0.444368	37.294	100.5	4.62	62.4402	0.74461	178.213	0.1339	1029.08	0.6397	1.4197	91.3575	2674	137.716	96.2938		108.318	3280	142.244	71.0922
	C2	D8	1.16	-5.68	1.59	0.8544	0.537358	42.37	78	4.45	43.075	0.826531	140.882	0.1563	770.122	0.6176	1.3799	91.086	2614	136.408	97.9828		108.96	3631	138.292	72.3041
	C2	D8	1.28	-5.38	1.78	1.0598	0.595393	45.459	79.5	3.93	45.5383	0.84327	117.908	0.1468	851.219	0.6548	1.3229	88.6194	2579	136.732	97.0126		96.7117	3409	153.527	69.608
	C2	D8	1.37	-5.55	1.65	1.2868	0.779879	43.33	86.5	5.31	49.7659	0.776184	100.894	0.1303	996.393	0.5875	1.3606	90.7065	2713	135.885	95.1129		110.46	3552	148.911	65.2449
C3D2	C3	D2	5.18	-2.33	1.21	0.4416	0.364959	40.015	137	4.66	65.1379	0.61989	400.849	0.1052	1682.65	0.6204	1.4208	72.4887	376	77.7608	68.9497		109.468	779	80.8758	50.4724
	C3	D2	4.97	-3.16	1.43	0.4282	0.299441	39.51	151.5	3.4	63.0882	0.74273	446.077	0.1117	1710.03	0.6412	1.4891	74.5249	378	76.3525	69.8757		128.149	821	85.7914	46.1368
	C3	D2	6.26	-3.25	1.36	0.3252	0.239118	41.006	134.5	3.54	45.4954	0.7984	539.686	0.1302	1347.97	0.5765	1.4604	74.2534	325	78.7668	68.095		117.792	857	83.6504	48.8592
	C3	D2	4.85	-2.77	2	0.6138	0.3069	47.222	142	3.72	57.249	0.7091	308.28	0.1378	1373.16	0.6021	1.3906	73.1149	361	76.8324	66.2904		126.292	795	77.1609	50.5643
	C3	D2	4.01	-3.41	1.54	0.6103	0.396299	42.533	140	4.48	76.8289	0.67392	299.087	0.1103	1654.88	0.5984	1.4779	74.0142	355	78.0153	69.112		120.477	869	71.0718	45.5889
	C3	D2	5	-2.28	1.01	0.4992	0.494257	43.736	126	3.77	66.7898	0.6628	340.016	0.1258	1349.25	0.6012	1.4421	74.1674	364	77.2147	70.763		129.678	882	84.4553	49.7735
C3D4	C3	D4	3.59	-4.81	1.42	0.8428	0.593521	43.962	121.5	3.97	54.7199	0.72905	196.324	0.1268	1304.91	0.6275	1.4371	80.4977	1345	105.022	80.6792		113.015	1641	107.666	56.8885
	C3	D4	3.4	-5.3	0.92	0.5303	0.576413	45.675	113	3.38	40.7715	0.65521	299.217	0.1264	1255.34	0.6429	1.3882	75.3394	1353	105.794	79.9035		116.222	1366	110.229	57.3319
	C3	D4	3.97	-2.92	1.59	0.86	0.540881	38.155	128.5	4.94	51.2204	0.63688	193.785	0.1438	1158.94	0.6117	1.3917	75.6109	1415	103.815	79.1512		105.58	1678	114.785	56.7921
	C3	D4	2.93	-3.73	1.48	0.5104	0.344865	46.221	105	3.78	48.635	0.81939	296.279	0.1278	1183.26	0.6208	1.4502	76.849	1369	104.447	77.261		113.21	1426	117.247	56.4359
	C3	D4	3.8	-3.02	1.55	0.9054	0.584129	45.223	112	4.76	52.4457	0.841	173.65	0.1337	1175.94	0.6012	1.4329	77.561	1427	105.213	81.5074		102.148	1725	113.805	55.4827
	C3	D4	2.71	-4.46	2.2	0.7164	0.325636	47.423	104.5	3.85	43.0423	0.7949	212.064	0.1325	1146.59	0.6107	1.3872	78.016	1396	104.903	78.2903		103.747	1576	107.579	60.1744
C3D8	C3	D8	2.92	-4.86	1.36	1.0803	0.794338	40.126	86	3.44	62.6219	0.74484	116.751	0.119	1059.88	0.6108	1.4553	70.181	2298	172.824	110.825		92.4284	2776	192.799	82.5183
	C3	D8	2.68	-5.48	1.4	0.9097	0.649786	41.505	79	4.42	43.39	0.8586	132.467	0.1471	819.205	0.6629	1.3783	70.8597	2348	175.037	111.088		93.3222	2871	187.41	79.7076
	C3	D8	2.81	-6.76	0.95	0.7365	0.775263	44.484	101.5	4.35	34.3749	0.7612	198.213	0.1565	932.805	0.6453	1.3726	67.0588	2320	173.897	110.945		88.3164	2784	201.58	74.6044
	C3	D8	1.69	-4.82	1.33	0.5127	0.385489	49.639	94	4.41	41.2298	0.8146	280.162	0.1568	916.065	0.6326	1.3575	66.1086	2284	172.254	109.05		87.065	2704	191.384	78.245
	C3	D8	1.9	-4.46	2.06	0.8865	0.43034	40.025	71.5	4.79	56.9057	0.7864	125.804	0.1653	674.682	0.6704	1.4269	68.8571	2307	174.356	112.737		90.6848	2864	184.914	75.8904
	C3	D8	2.31	-6.8	1.73	0.8133	0.470116	49.791	76	4.51	37.2993	0.9023	154.667	0.1834	685.883	0.6325	1.3793	68.1092	2247	171.258	112.037		89.6998	2669	179.659	83.3881
