# Supplementary material for: Plastic response of Medicago sativa L. root system traits and cold resistance to simulated rainfall events
Source: PeerJ. 2021 Sep 9;9:e11962. doi: 10.7717/peerj.11962 (PMC8435203; doi:10.7717/peerj.11962)
Supplement: Supplemental Information 2 [file peerj-09-11962-s002.docx]

**Information on irrigation time and quota among three simulated rainfall events.**

|  | 1st day | 2nd day | 3rd day | 4th day | 5th day | 6th day | 7th day | 8th day |  |
| --- | --- | --- | --- | --- | --- | --- | --- | --- | --- |
| D2 |  | X1 |  | X2 |  | X3 |  | X4 | …… |
| D4 |  |  |  | X1+X2 |  |  |  | X3+X4 | …… |
| D8 |  |  |  |  |  |  |  | X1+X2+X3+X4 | …… |

Note: X1、X2…… and X8 represent different irrigation amounts.
